# Supplementary material
Source: MDPI journal article supplement (https://www.mdpi.com/1424-8247/16/10/1351)
Supplement: s1 [file s1]

# Isolation, identification, anti-inflammatory, and *in silico* analysis of new lignans from *Ferula sinkiangensis*

Junchi Wang <sup>1</sup>, Qi Zheng <sup>1</sup>, Minghui Shi <sup>2</sup>, Huaxiang Wang <sup>1</sup>, Congzhao Fan <sup>2</sup>,  
Guoping Wang <sup>2</sup>, Yaqin Zhao <sup>2</sup>, Jianyong Si <sup>1,\*</sup>

<sup>1</sup> The Key Laboratory of Bioactive Substances and Resources Utilization of Chinese Herbal Medicine, Ministry of Education, Institute of Medicinal Plant Development, Chinese Academy of Medical Sciences & Peking Union Medical College, Beijing 100193, China; jcwang@implad.ac.cn (J.W.); zhengqi@implad.ac.cn (Q.Z.); wanghuaxiang@implad.ac.cn (H.W.)

<sup>2</sup> Xinjiang Institute of Chinese Materia Medica and Ethnodrug, Urumqi, 830002, China; xjshmh@126.com (M.S.); fcz\_840701@163.com (C.F.); ping112\_003@163.com (G.W.); xjzyq123@126.com (Y.Z.)

\* Correspondence: jysi@implad.ac.cn (J.S.); Tel.: +86-010-57833299

## Contents

### **MS, UV, IR and NMR Spectra of Compound 1**

Fig. S1. HRESIMS spectrum of **1**

Fig. S2. IR spectrum of **1**

Fig. S3. UV spectrum in MeOH of **1**

Fig. S4.  $^1\text{H}$ -NMR spectrum ( $\text{CD}_3\text{OD}$ , 600 MHz) of **1**

Fig. S5.  $^{13}\text{C}$ -NMR spectrum ( $\text{CD}_3\text{OD}$ , 150 MHz) of **1**

Fig. S6.  $^1\text{H}$ - $^1\text{H}$  COSY spectrum ( $\text{CD}_3\text{OD}$ ) of **1**

Fig. S7. HSQC spectrum ( $\text{CD}_3\text{OD}$ ) of **1**

Fig. S8. HMBC spectrum ( $\text{CD}_3\text{OD}$ ) of **1**

Fig. S9. NOESY spectrum ( $\text{CD}_3\text{OD}$ ) of **1**

Fig. S10 The conformers of compounds **1** and **2** with a Boltzmann-population greater than 5% selected for ECD calculations

### **MS, UV, IR and NMR Spectra of Compound 2**

Fig. S11. HRESIMS spectrum of **2**

Fig. S12. IR spectrum of **2**

Fig. S13. UV spectrum in MeOH of **2**

Fig. S14.  $^1\text{H}$ -NMR spectrum ( $\text{CD}_3\text{OD}$ , 600 MHz) of **2**

Fig. S15. Comparison of  $^1\text{H}$  NMR spectra of compounds **1** and **2** from  $\delta_{\text{H}}$  2.0 to 6.5 ppm.

Fig. S16.  $^{13}\text{C}$ -NMR spectrum ( $\text{CD}_3\text{OD}$ , 150 MHz) of **2**

Fig. S17.  $^1\text{H}$ - $^1\text{H}$  COSY spectrum ( $\text{CD}_3\text{OD}$ ) of **2**

Fig. S18. HSQC spectrum ( $\text{CD}_3\text{OD}$ ) of **2**

Fig. S19. HMBC spectrum ( $\text{CD}_3\text{OD}$ ) of **2**

Fig. S20. NOESY spectrum ( $\text{CD}_3\text{OD}$ ) of **2**

### **MS, UV, IR and NMR Spectra of Compound 3**

Fig. S21. HRESIMS spectrum of **3**

Fig. S22. IR spectrum of **3**

Fig. S23. UV spectrum in MeOH of **3**

Fig. S24.  $^1\text{H}$ -NMR spectrum ( $\text{CD}_3\text{OD}$ , 600 MHz) of **3**

Fig. S25.  $^{13}\text{C}$ -NMR spectrum ( $\text{CD}_3\text{OD}$ , 150 MHz) of **3**

Fig. S26.  $^1\text{H}$ - $^1\text{H}$  COSY spectrum ( $\text{CD}_3\text{OD}$ ) of **3**

Fig. S27. HSQC spectrum ( $\text{CD}_3\text{OD}$ ) of **3**

Fig. S28. HMBC spectrum ( $\text{CD}_3\text{OD}$ ) of **3**

Fig. S29. NOESY spectrum ( $\text{CD}_3\text{OD}$ ) of **3**

# MS, UV, IR and NMR Spectra of Compound 1

AW-65\_170629163024 #3 RT: 0.02 AV: 1 NL: 6.03E7  
T: FTMS + p ESI Full ms [100.00-700.00]

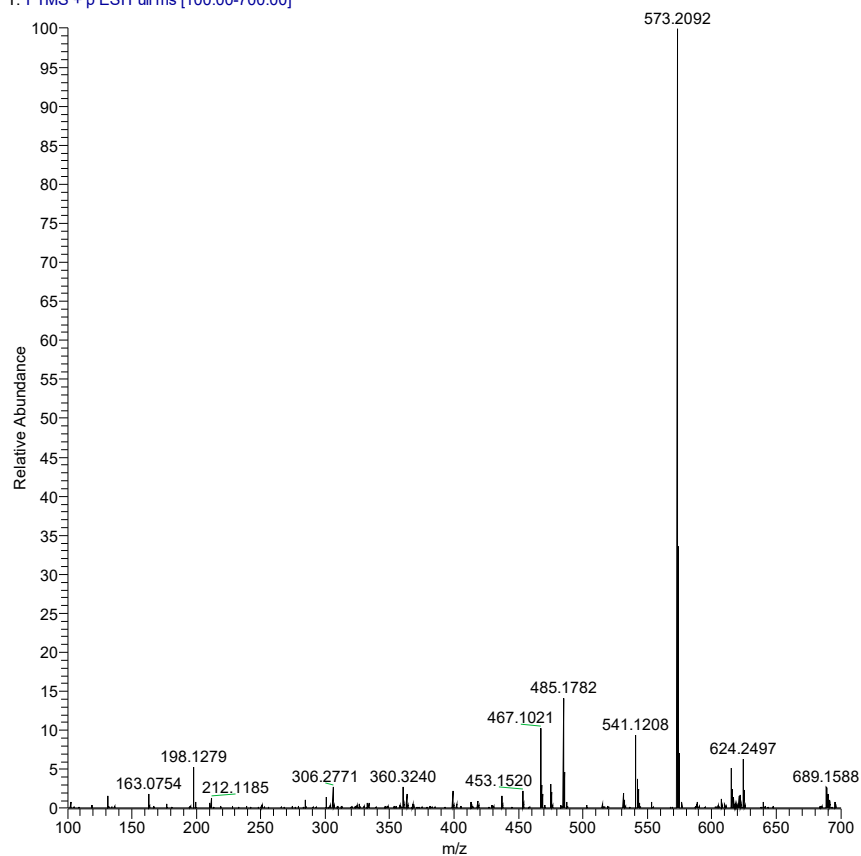

Fig. S1. HRESIMS spectrum of 1

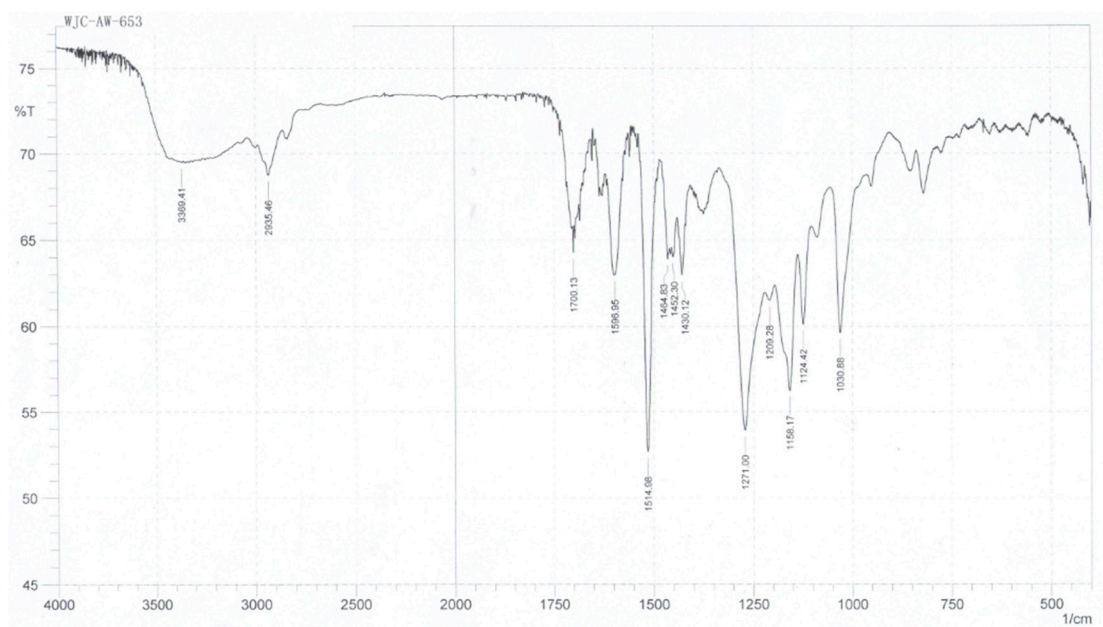

Fig. S2. IR spectrum of 1

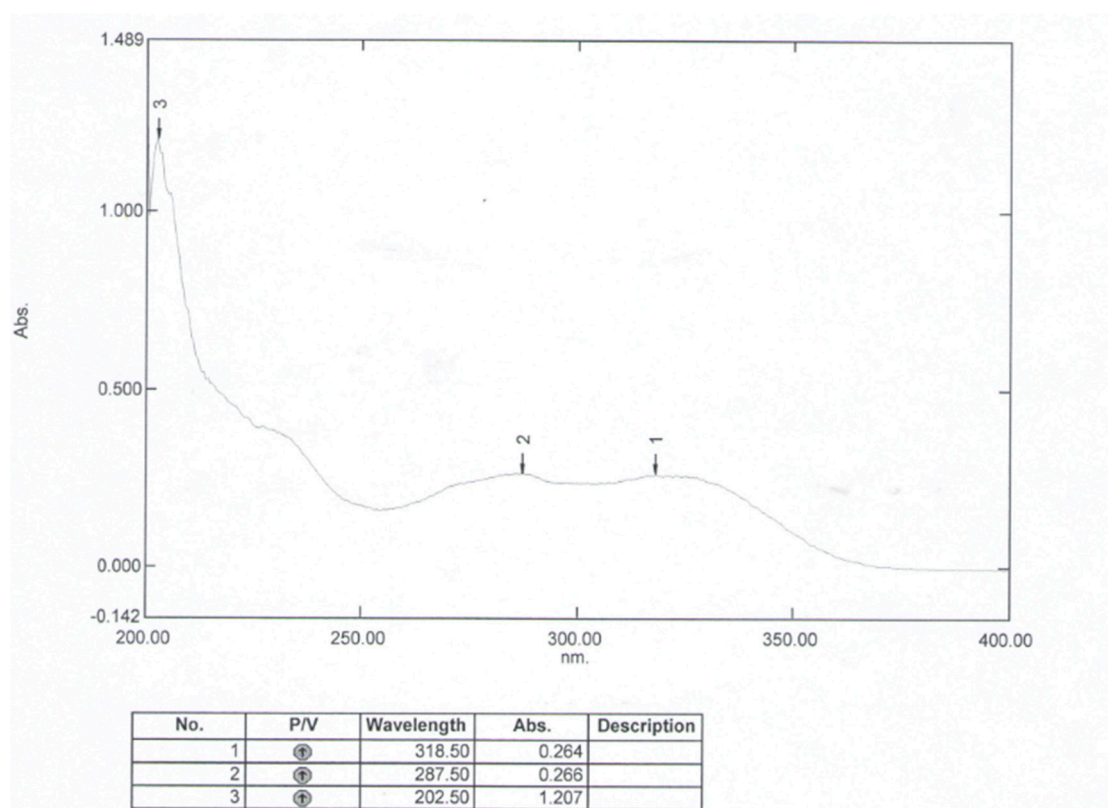

Fig. S3. UV spectrum in MeOH of **1**

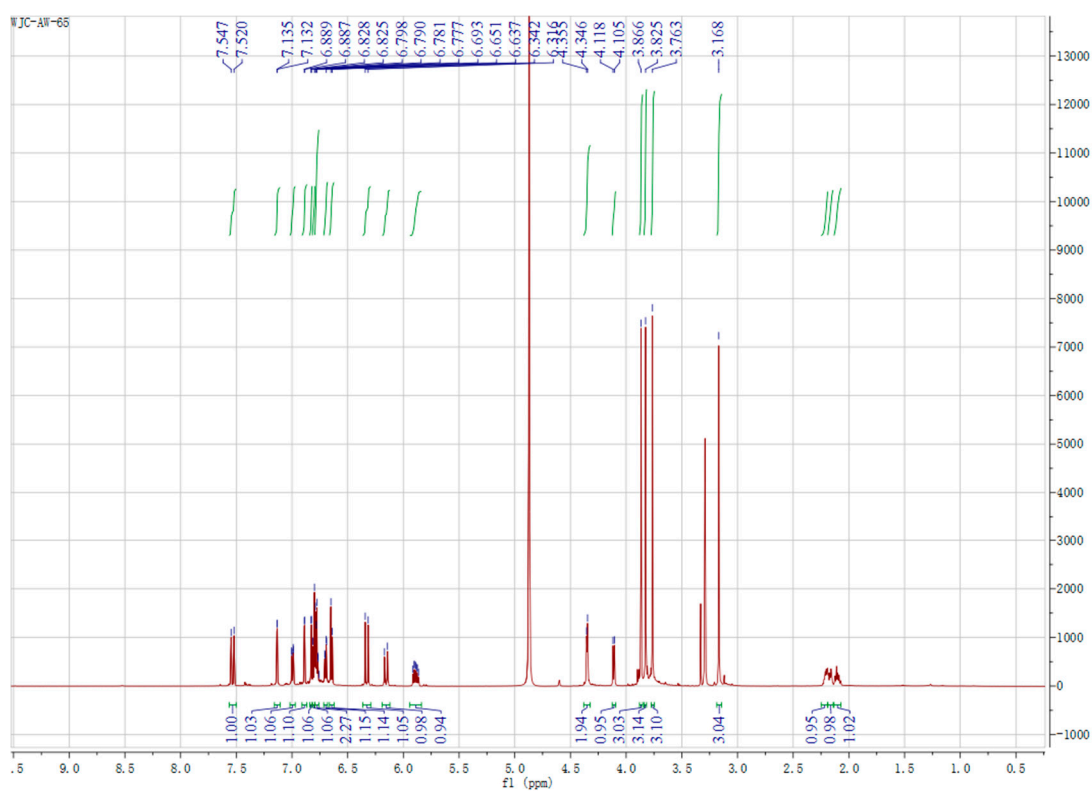

Fig. S4.  $^1\text{H}$ -NMR spectrum ( $\text{CD}_3\text{OD}$ , 600 MHz) of **1**

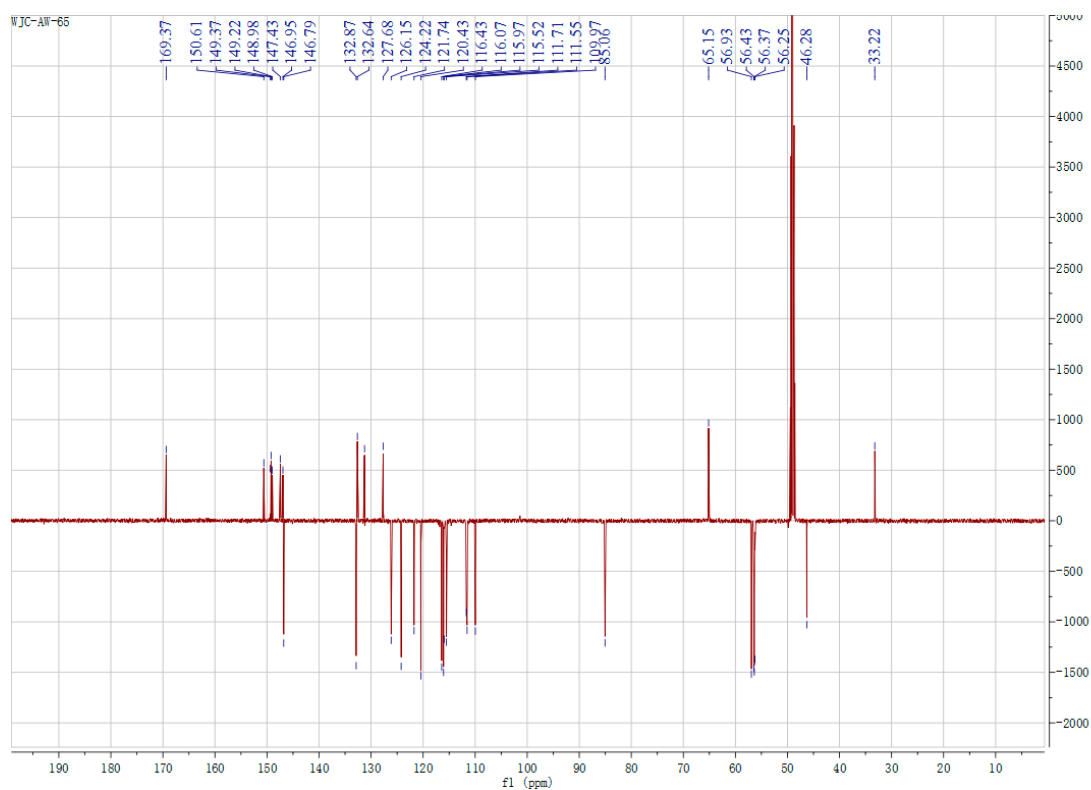

Fig. S5. <sup>13</sup>C-NMR spectrum (CD<sub>3</sub>OD, 150 MHz) of **1**

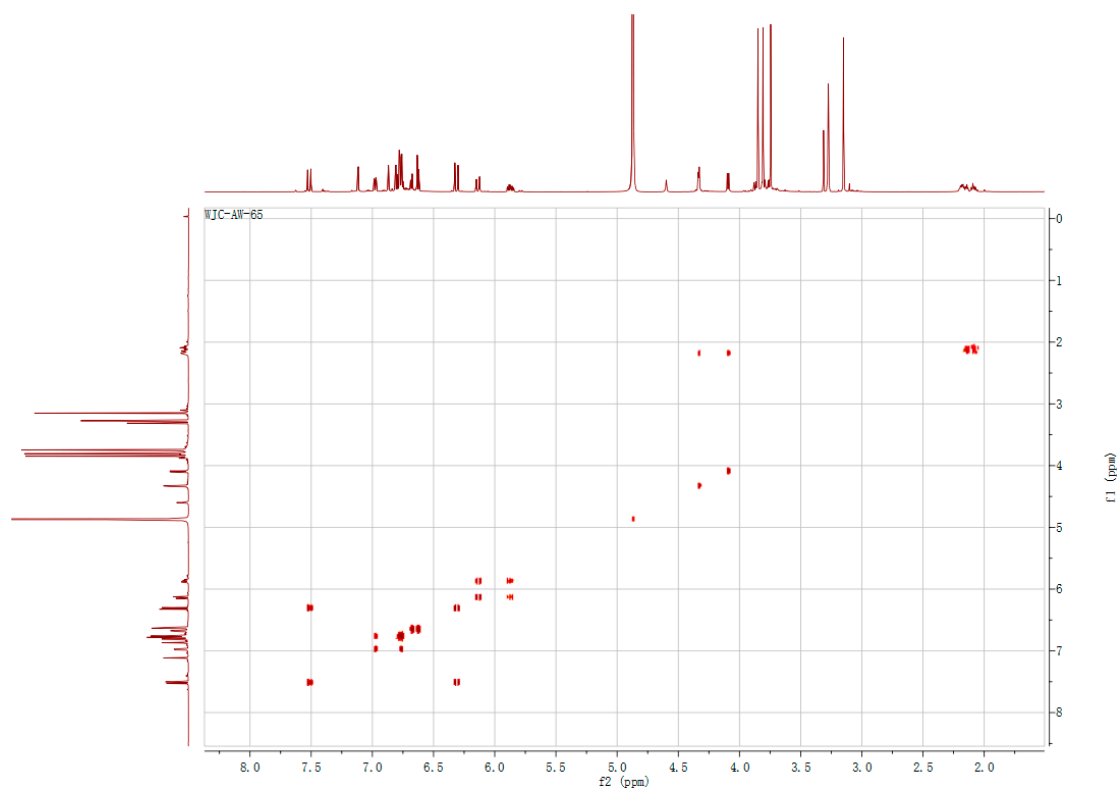

Fig. S6. <sup>1</sup>H-<sup>1</sup>H COSY spectrum (CD<sub>3</sub>OD) of **1**

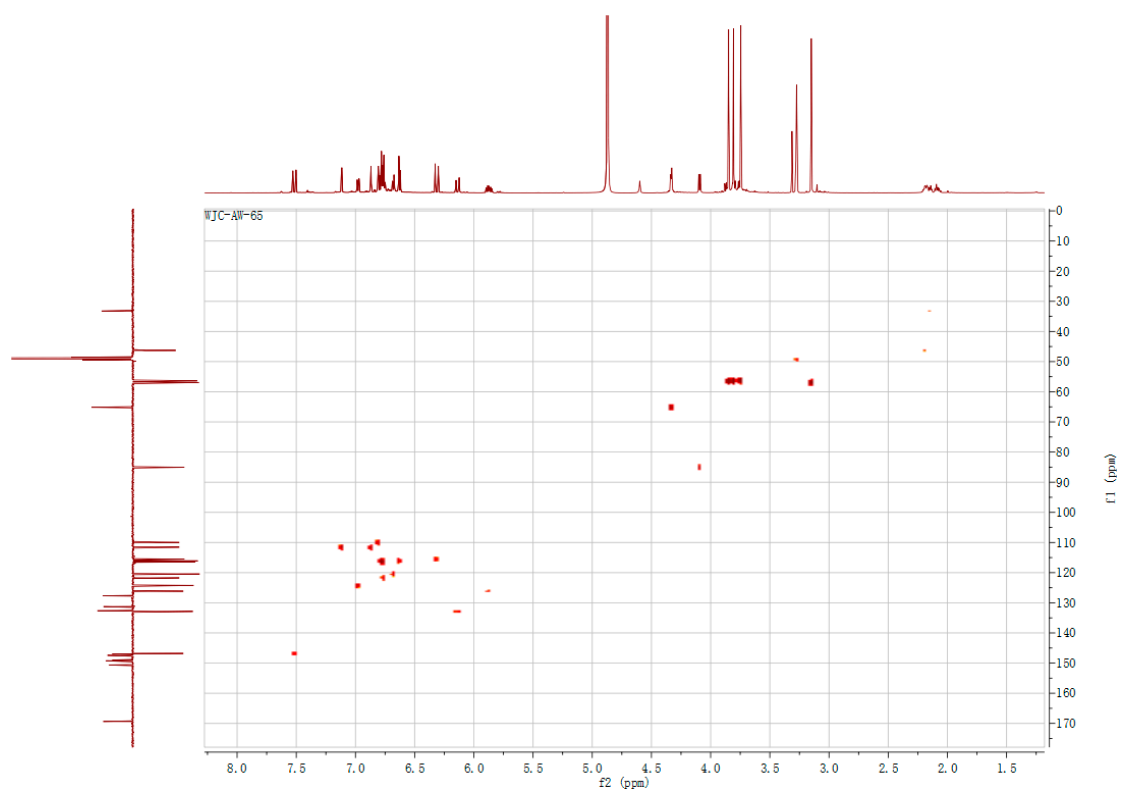

Fig. S7. HSQC spectrum (CD<sub>3</sub>OD) of **1**

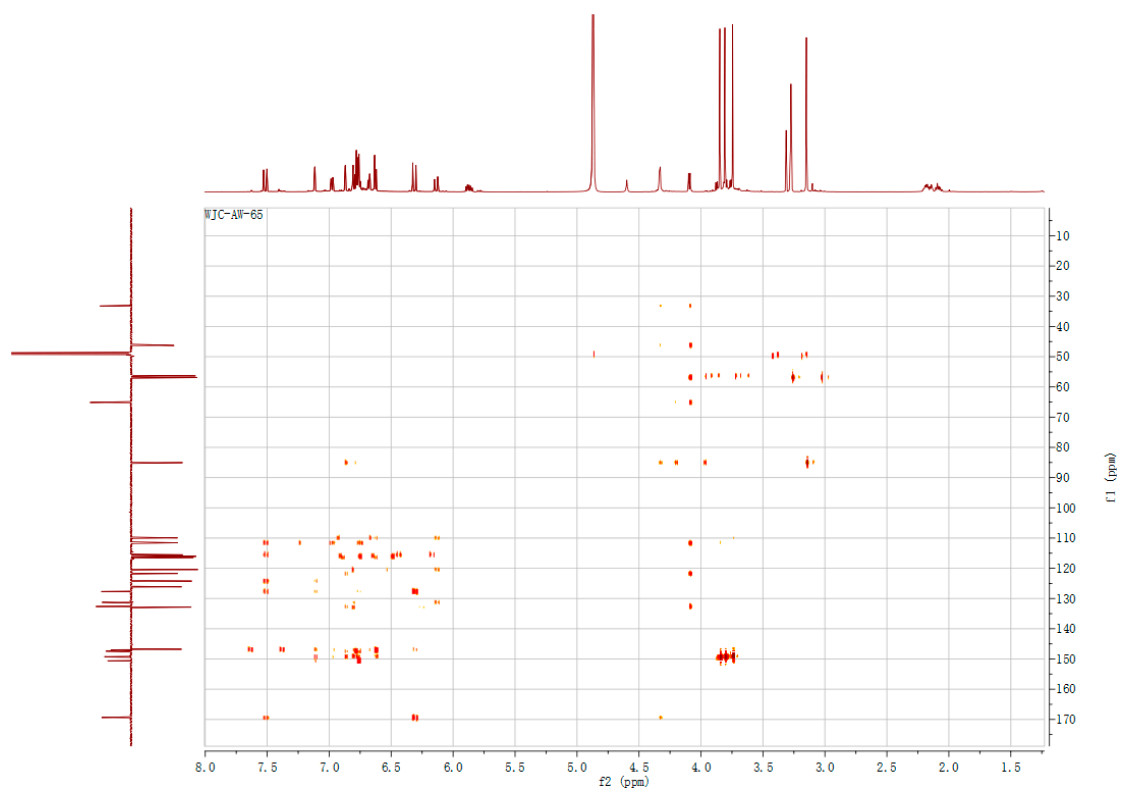

Fig. S8. HMBC spectrum (CD<sub>3</sub>OD) of **1**

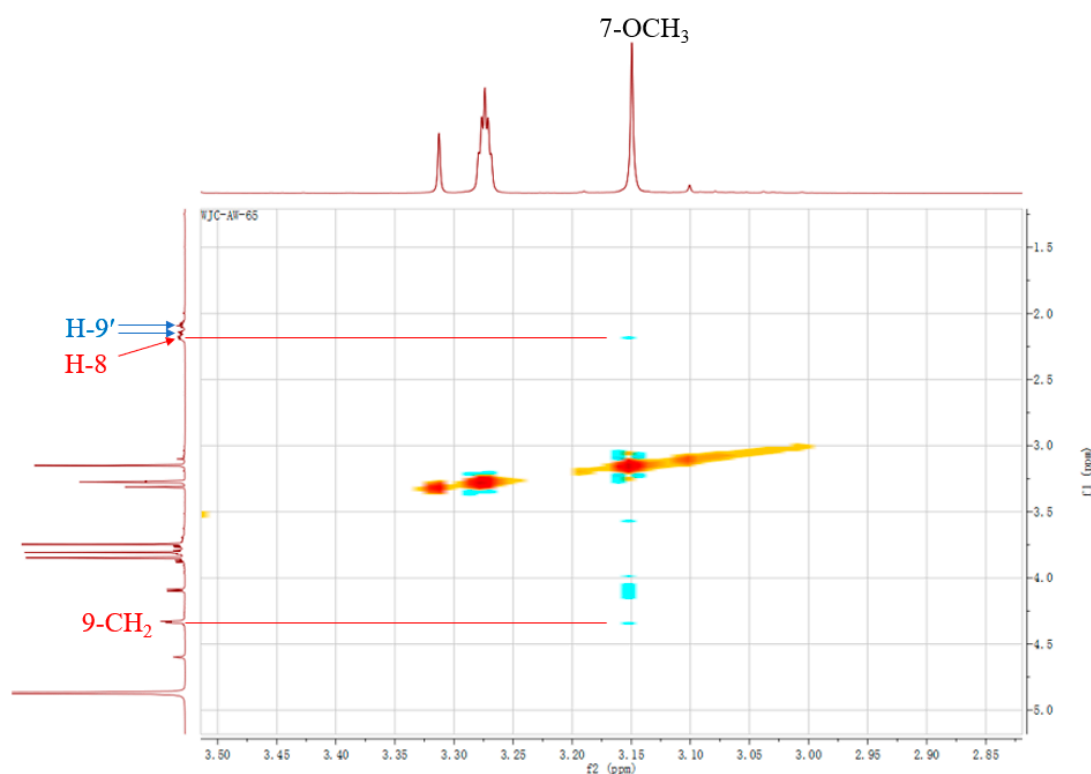

Fig. S9. NOESY spectrum (CD<sub>3</sub>OD) of **1**

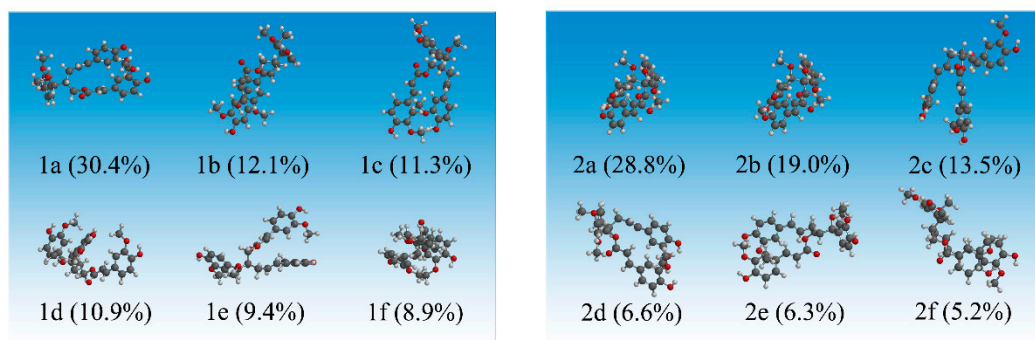

Compound **1**

Compound **2**

Fig. S10 The conformers of compounds **1** and **2** with a Boltzmann-population greater than 5% selected for ECD calculations



## MS, UV, IR and NMR Spectra of Compound 2

AW-66\_170629163024 #10 RT: 0.07 AV: 1 NL: 5.01E7  
T: FTMS + p ESI Full ms [100.00-700.00]

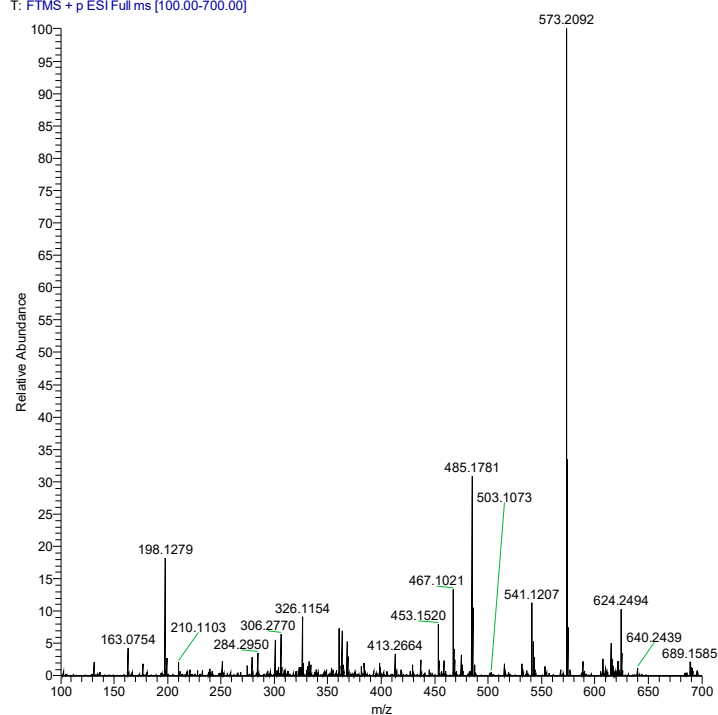

Fig. S11. HRESIMS spectrum of 2

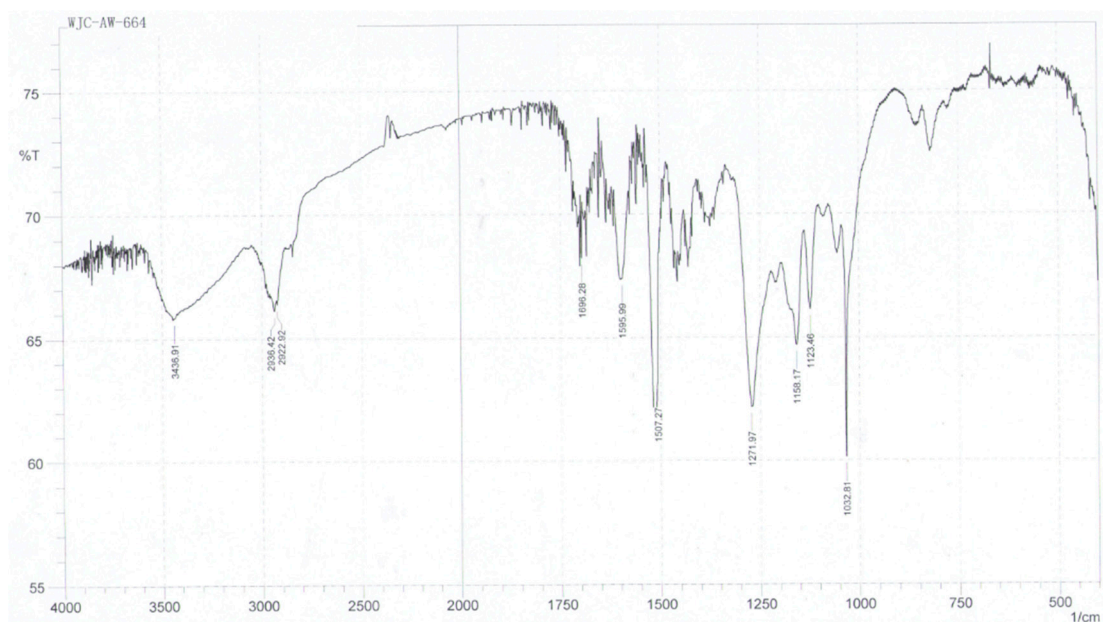

Fig. S12. IR spectrum of 2

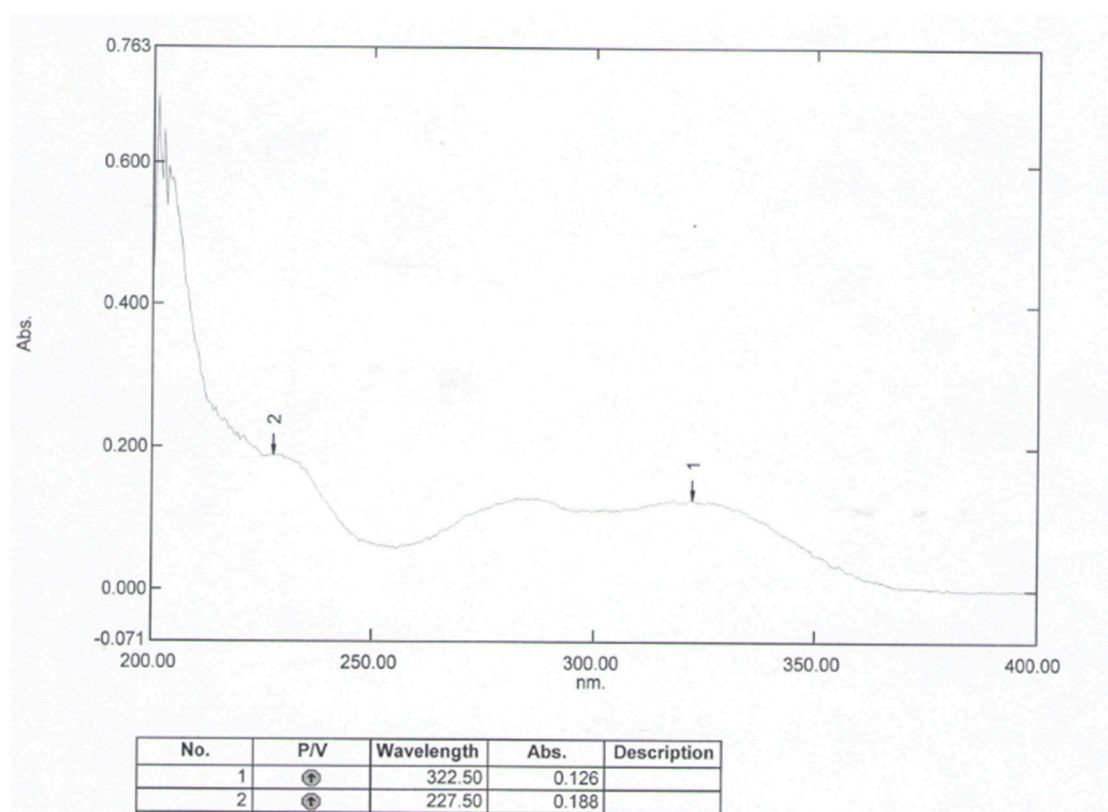

Fig. S13. UV spectrum in MeOH of **2**

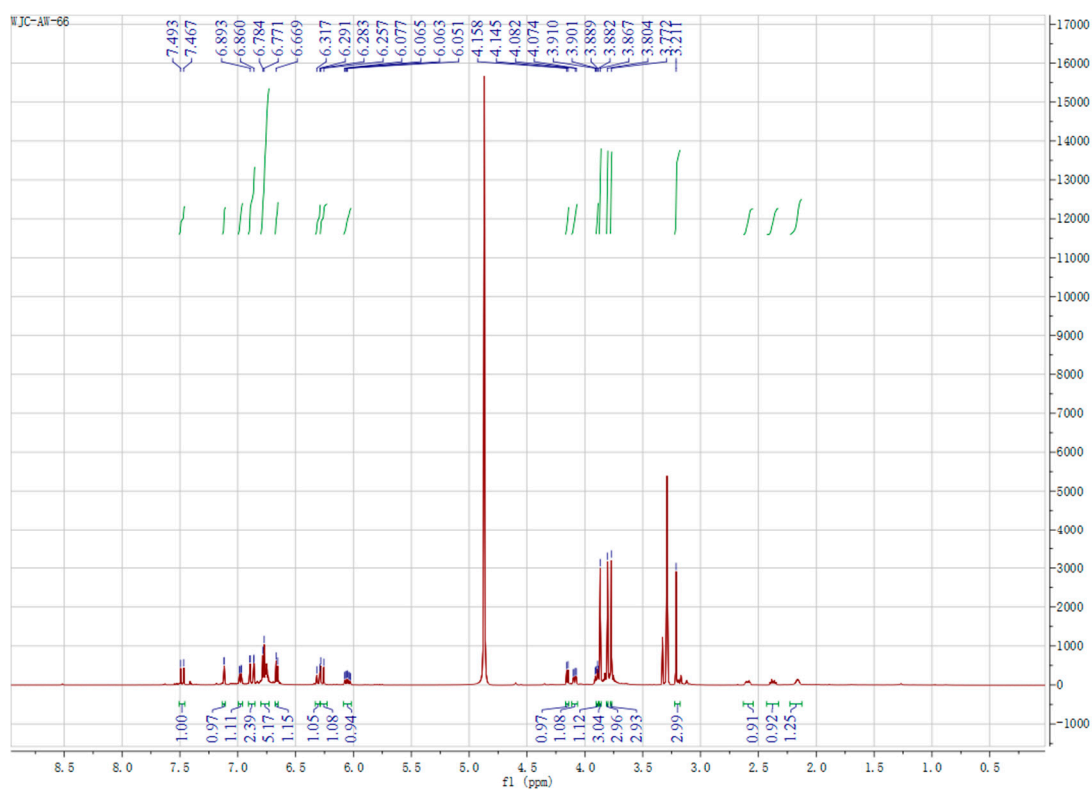

Fig. S14.  $^1\text{H}$ -NMR spectrum ( $\text{CD}_3\text{OD}$ , 600 MHz) of **2**

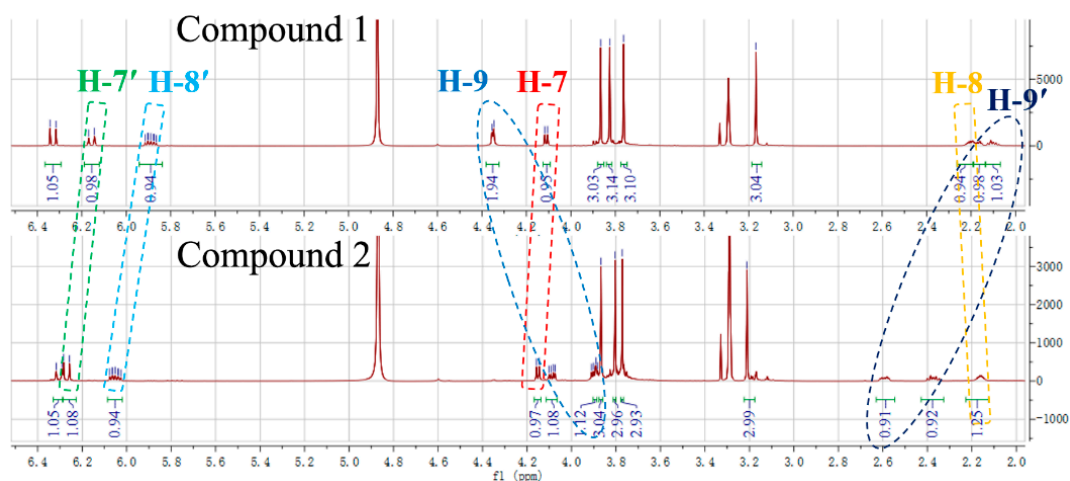

Fig. S15. Comparison of  $^1\text{H}$  NMR spectra of compounds **1** and **2** from  $\delta_{\text{H}}$  2.0 to 6.5 ppm.

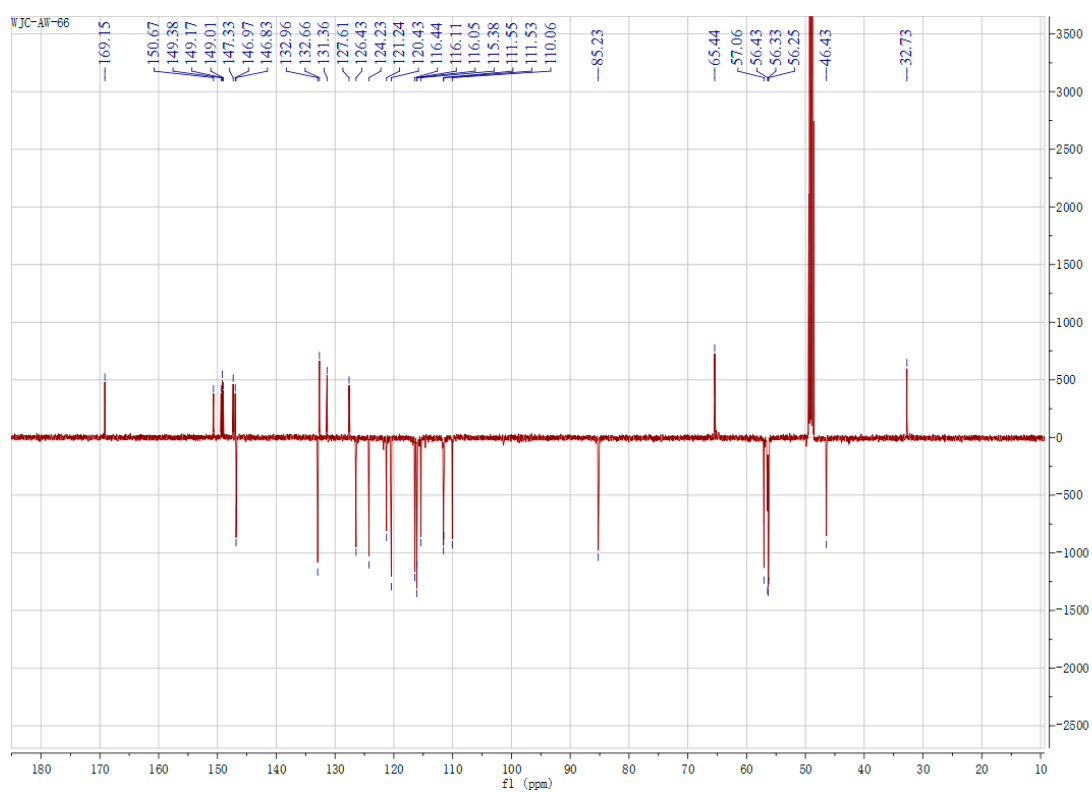

Fig. S16.  $^{13}\text{C}$ -NMR spectrum ( $\text{CD}_3\text{OD}$ , 150 MHz) of **2**

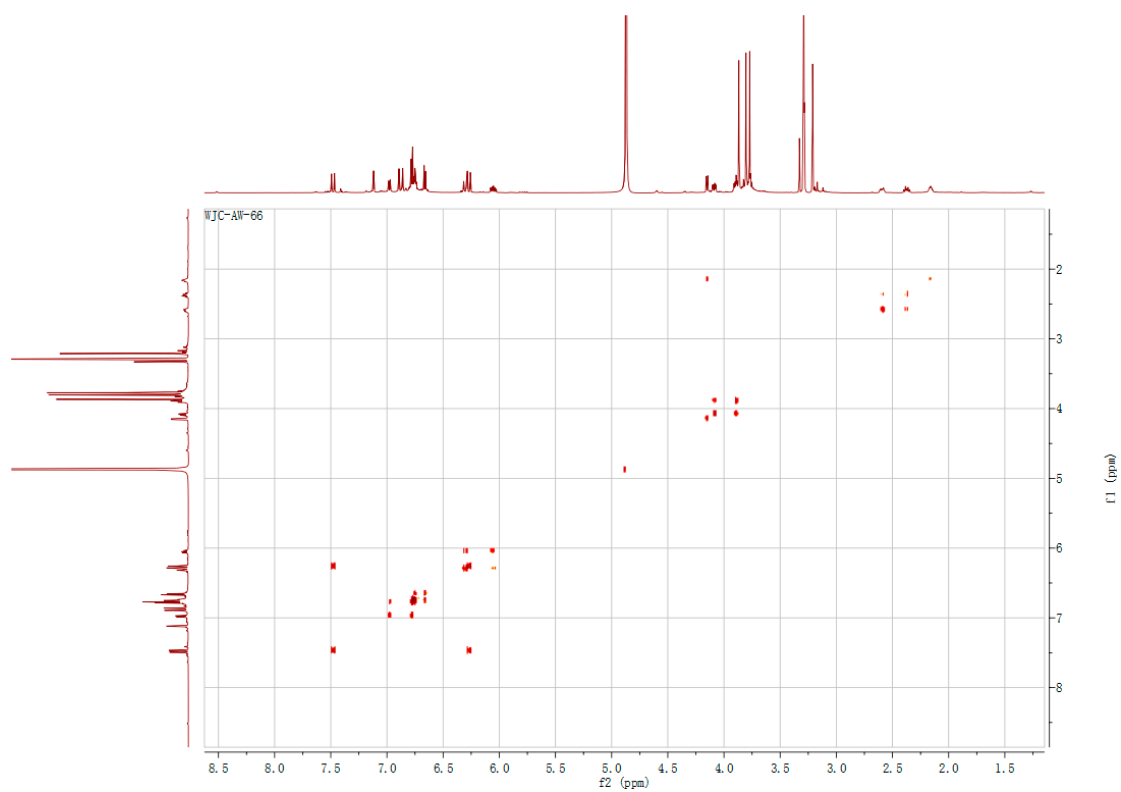

Fig. S17.  $^1\text{H}$ - $^1\text{H}$  COSY spectrum ( $\text{CD}_3\text{OD}$ ) of **2**

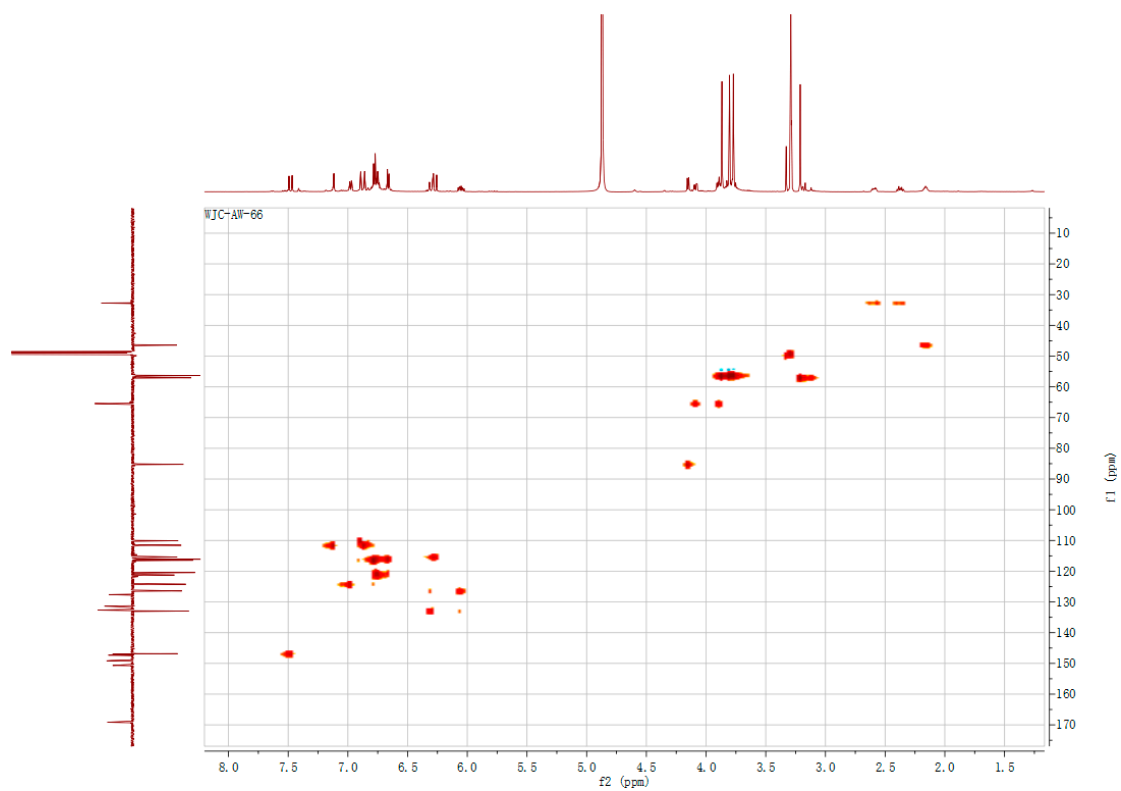

Fig. S18. HSQC spectrum ( $\text{CD}_3\text{OD}$ ) of **2**

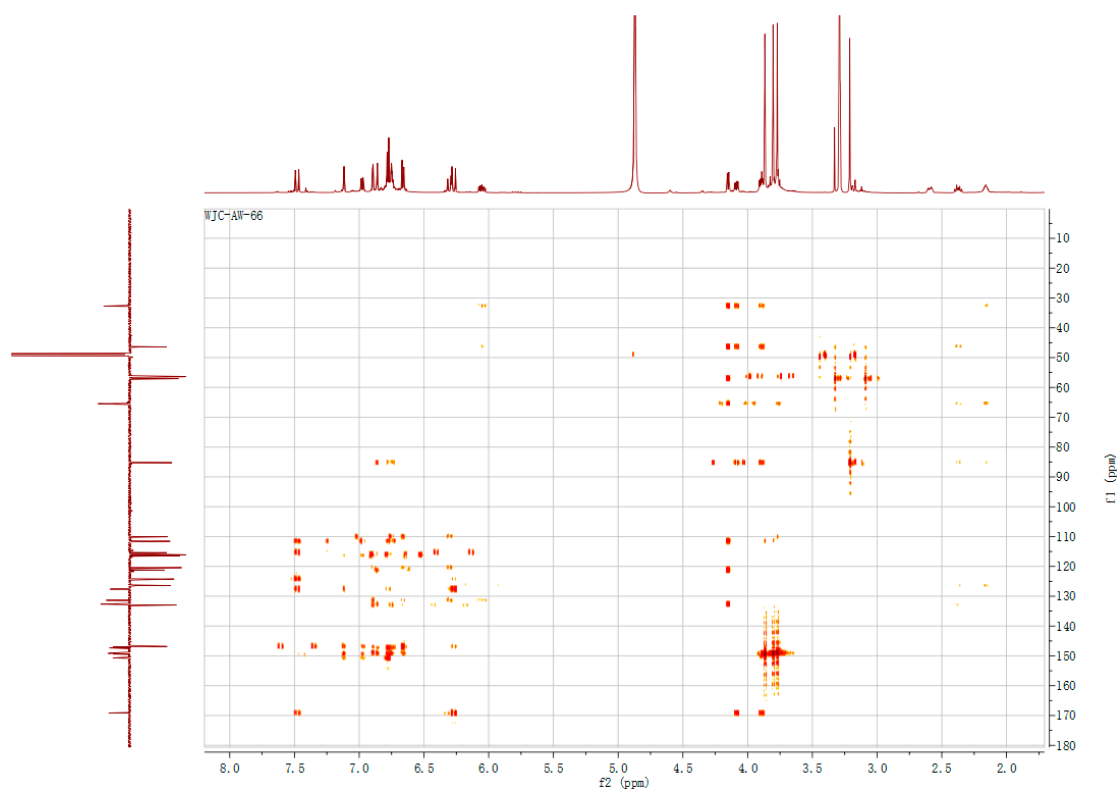

Fig. S19. HMBC spectrum (CD<sub>3</sub>OD) of **2**

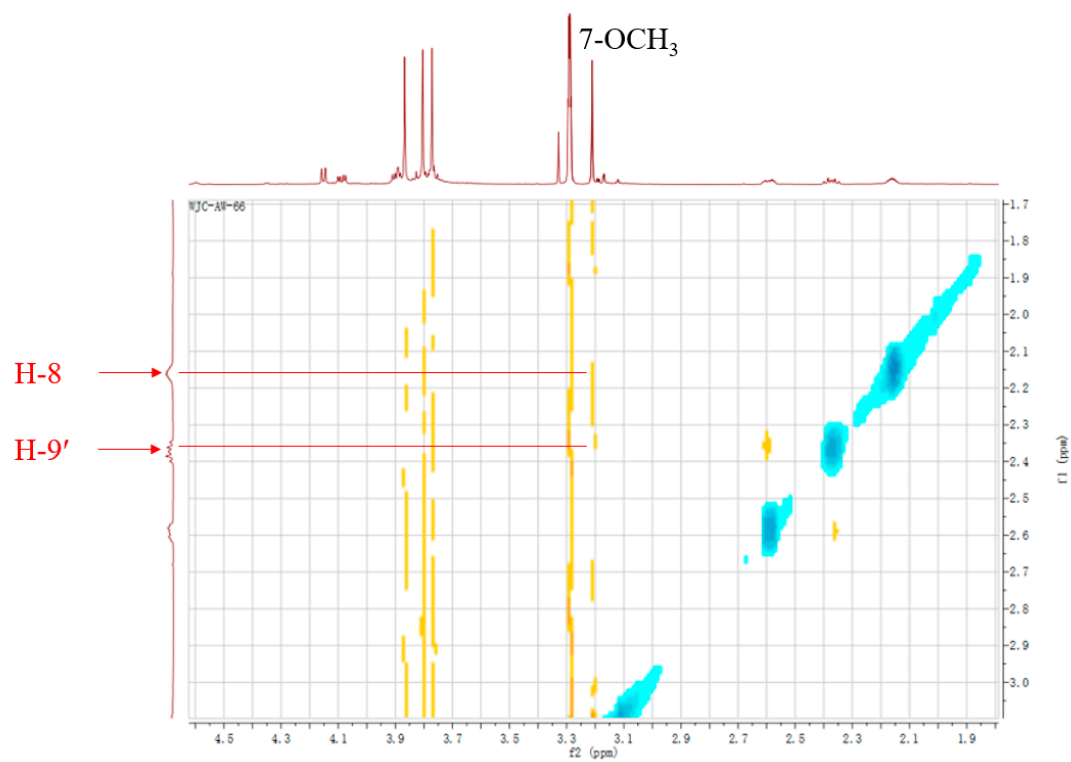

Fig. S20. NOESY spectrum (CD<sub>3</sub>OD) of **2**

## MS, UV, IR and NMR Spectra of Compound 3

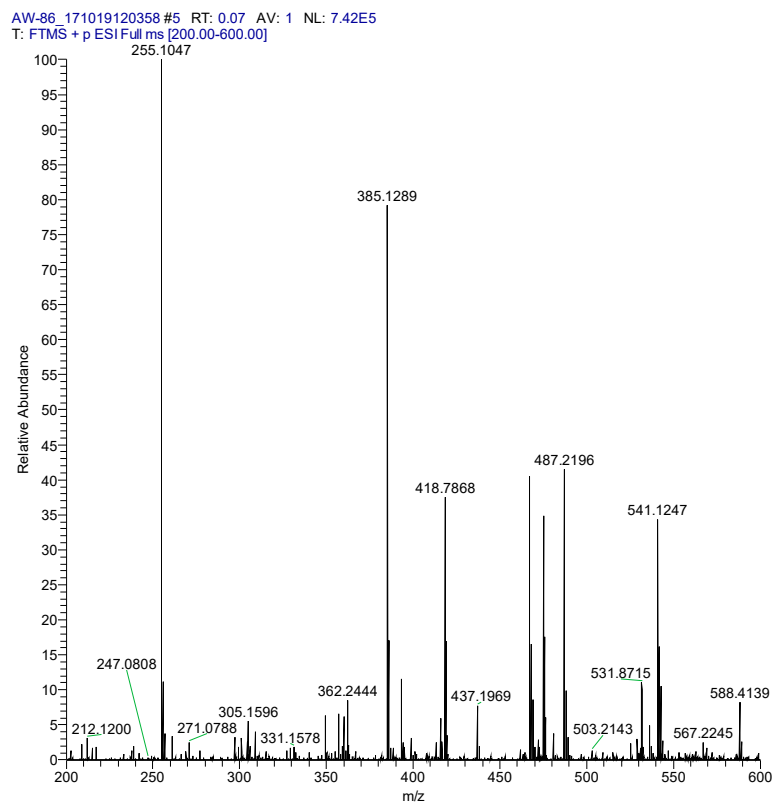

Fig. S21. HRESIMS spectrum of **3**

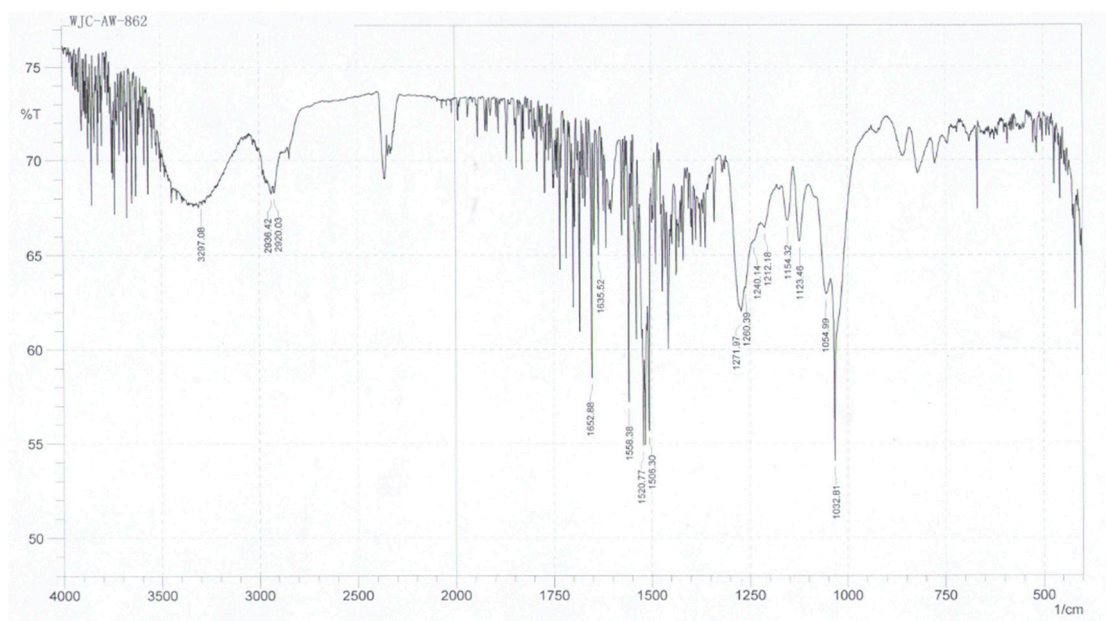

Fig. S22. IR spectrum of **3**

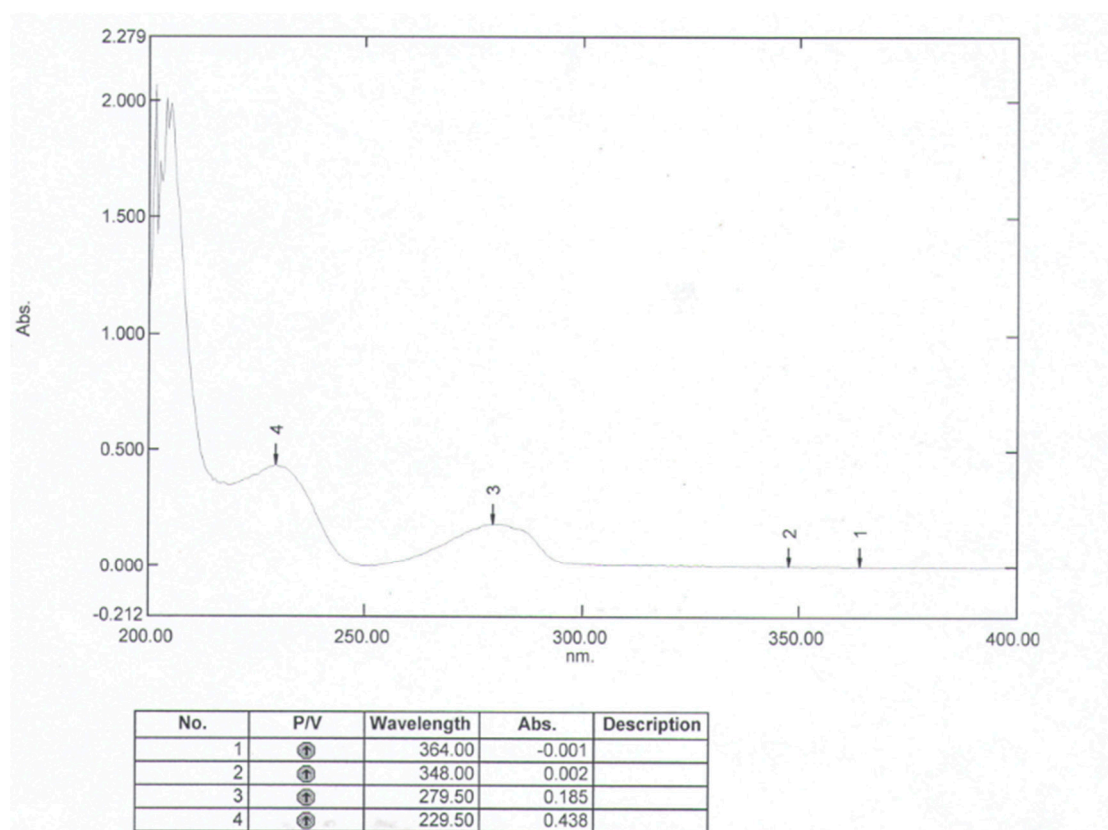

Fig. S23. UV spectrum in MeOH of **3**

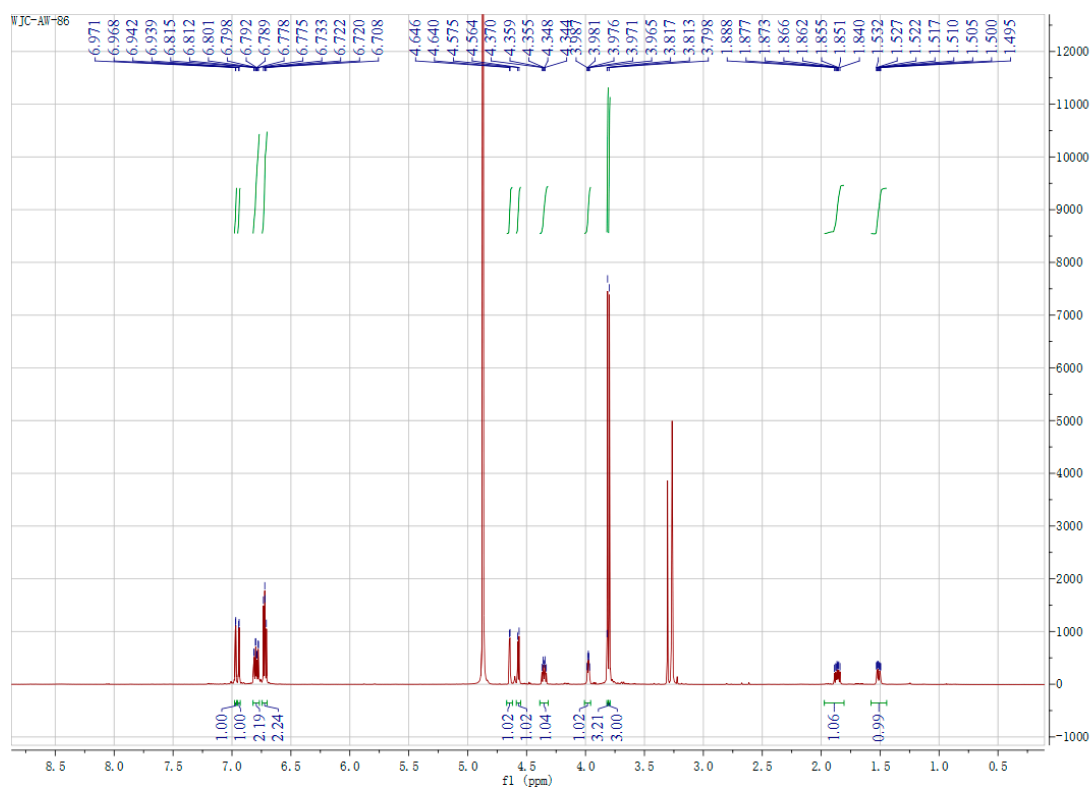

Fig. S24.  $^1\text{H}$ -NMR spectrum ( $\text{CD}_3\text{OD}$ , 600 MHz) of **3**

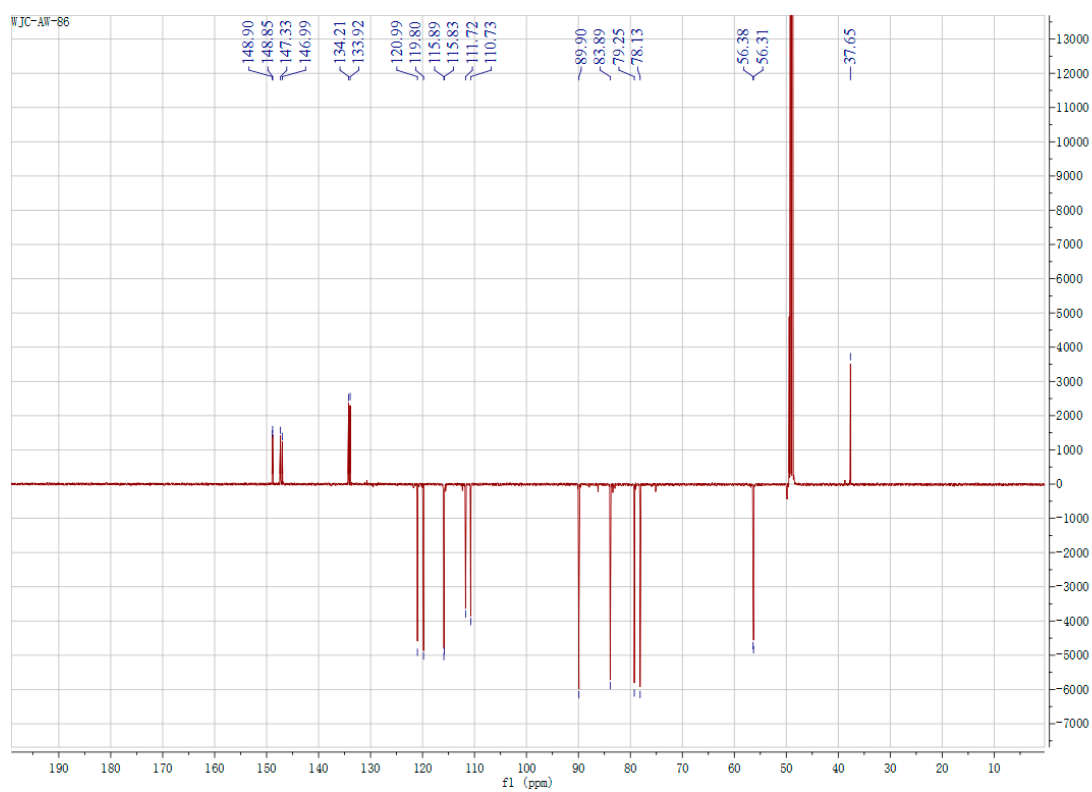

Fig. S25. <sup>13</sup>C-NMR spectrum (CD<sub>3</sub>OD, 150 MHz) of **3**

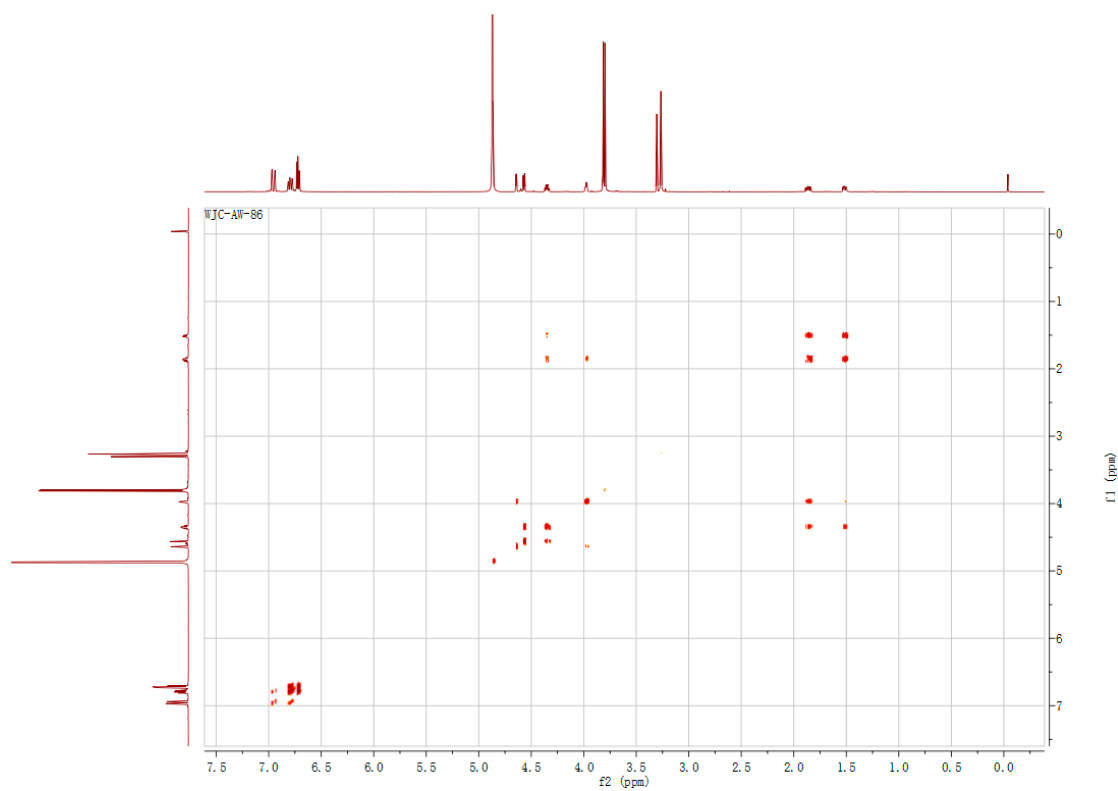

Fig. S26. <sup>1</sup>H-<sup>1</sup>H COSY spectrum (CD<sub>3</sub>OD) of **3**



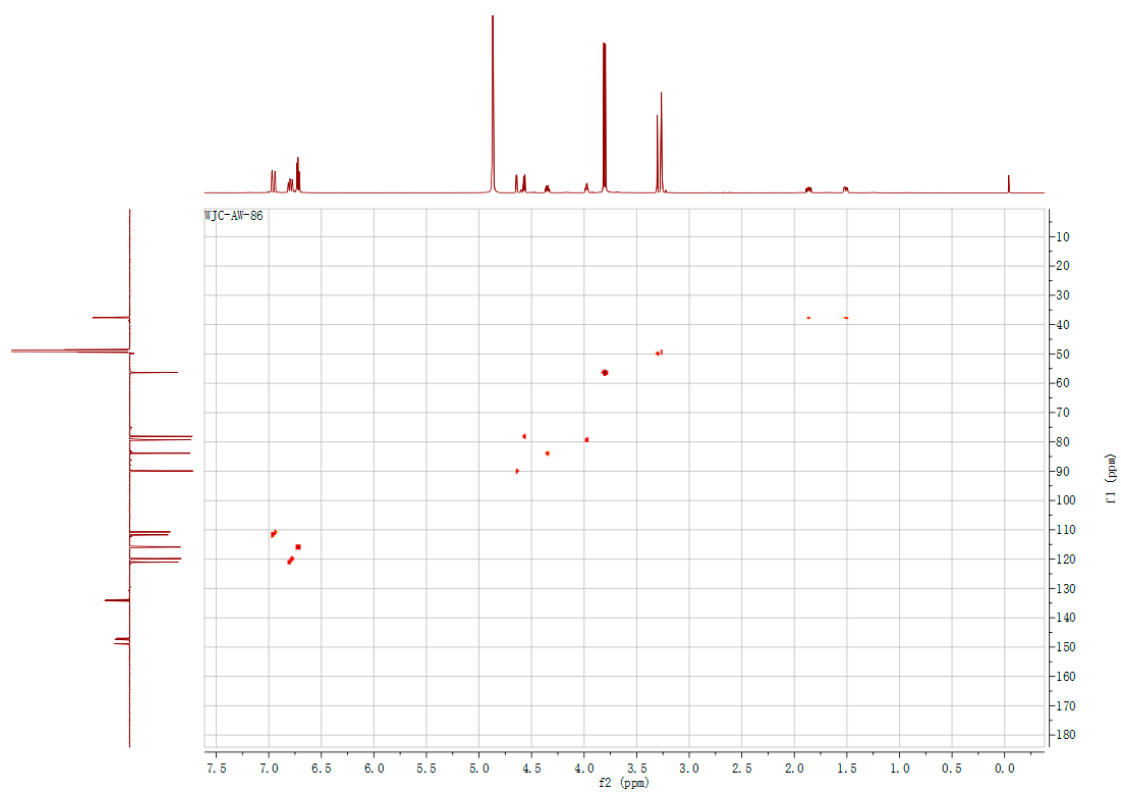

Fig. S27. HSQC spectrum (CD<sub>3</sub>OD) of **3**

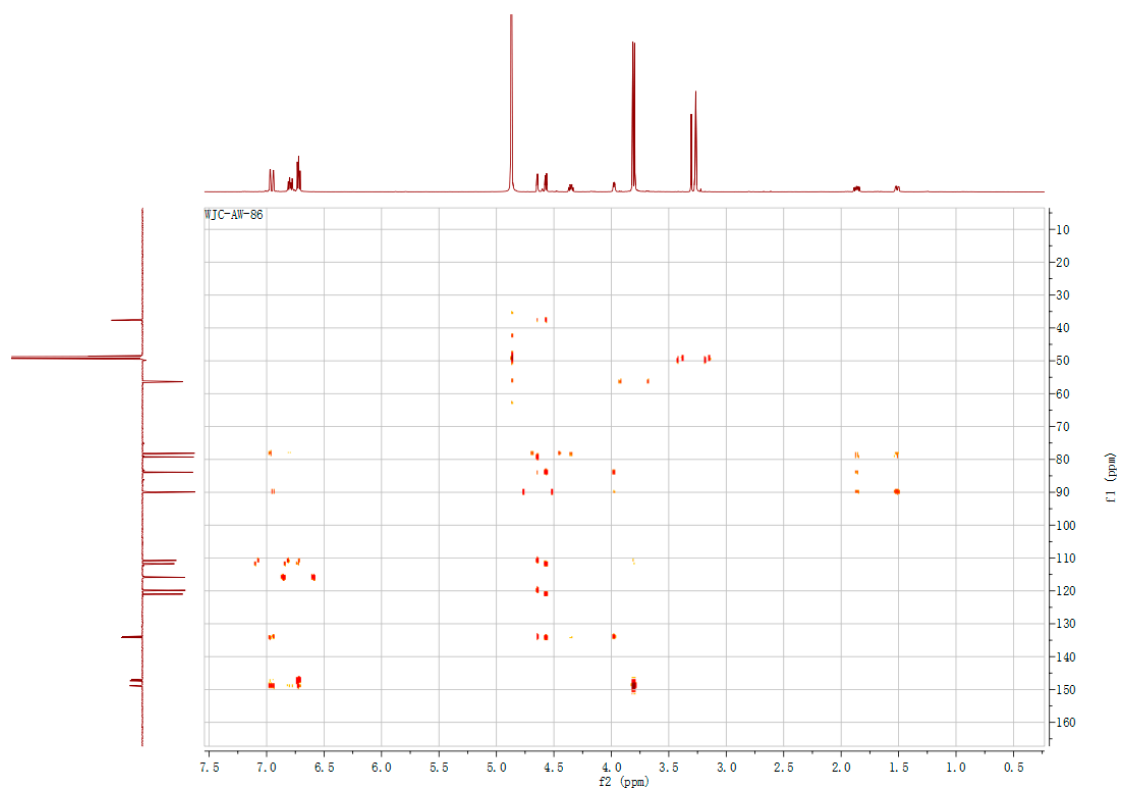

Fig. S28. HMBC spectrum (CD<sub>3</sub>OD) of **3**

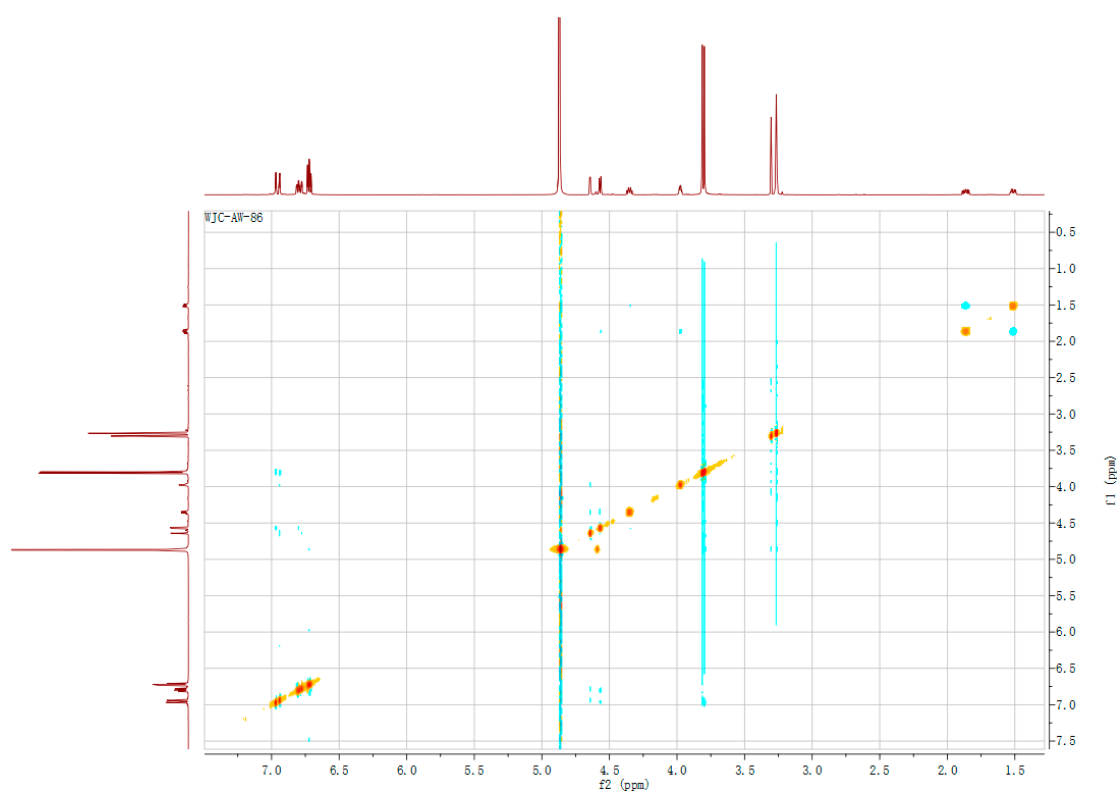

Fig. S29. NOESY spectrum ( $\text{CD}_3\text{OD}$ ) of **3**
